# Supplementary material for: The Profile of Immunophenotype and Genotype Aberrations in Subsets of Pediatric T-Cell Acute Lymphoblastic Leukemia
Source: PubMed Central journal article supplement (PMC6503680; doi:10.3389/fonc.2019.00316), 2019-04-30
Supplement: Image_2.pdf [file Image_2.pdf]

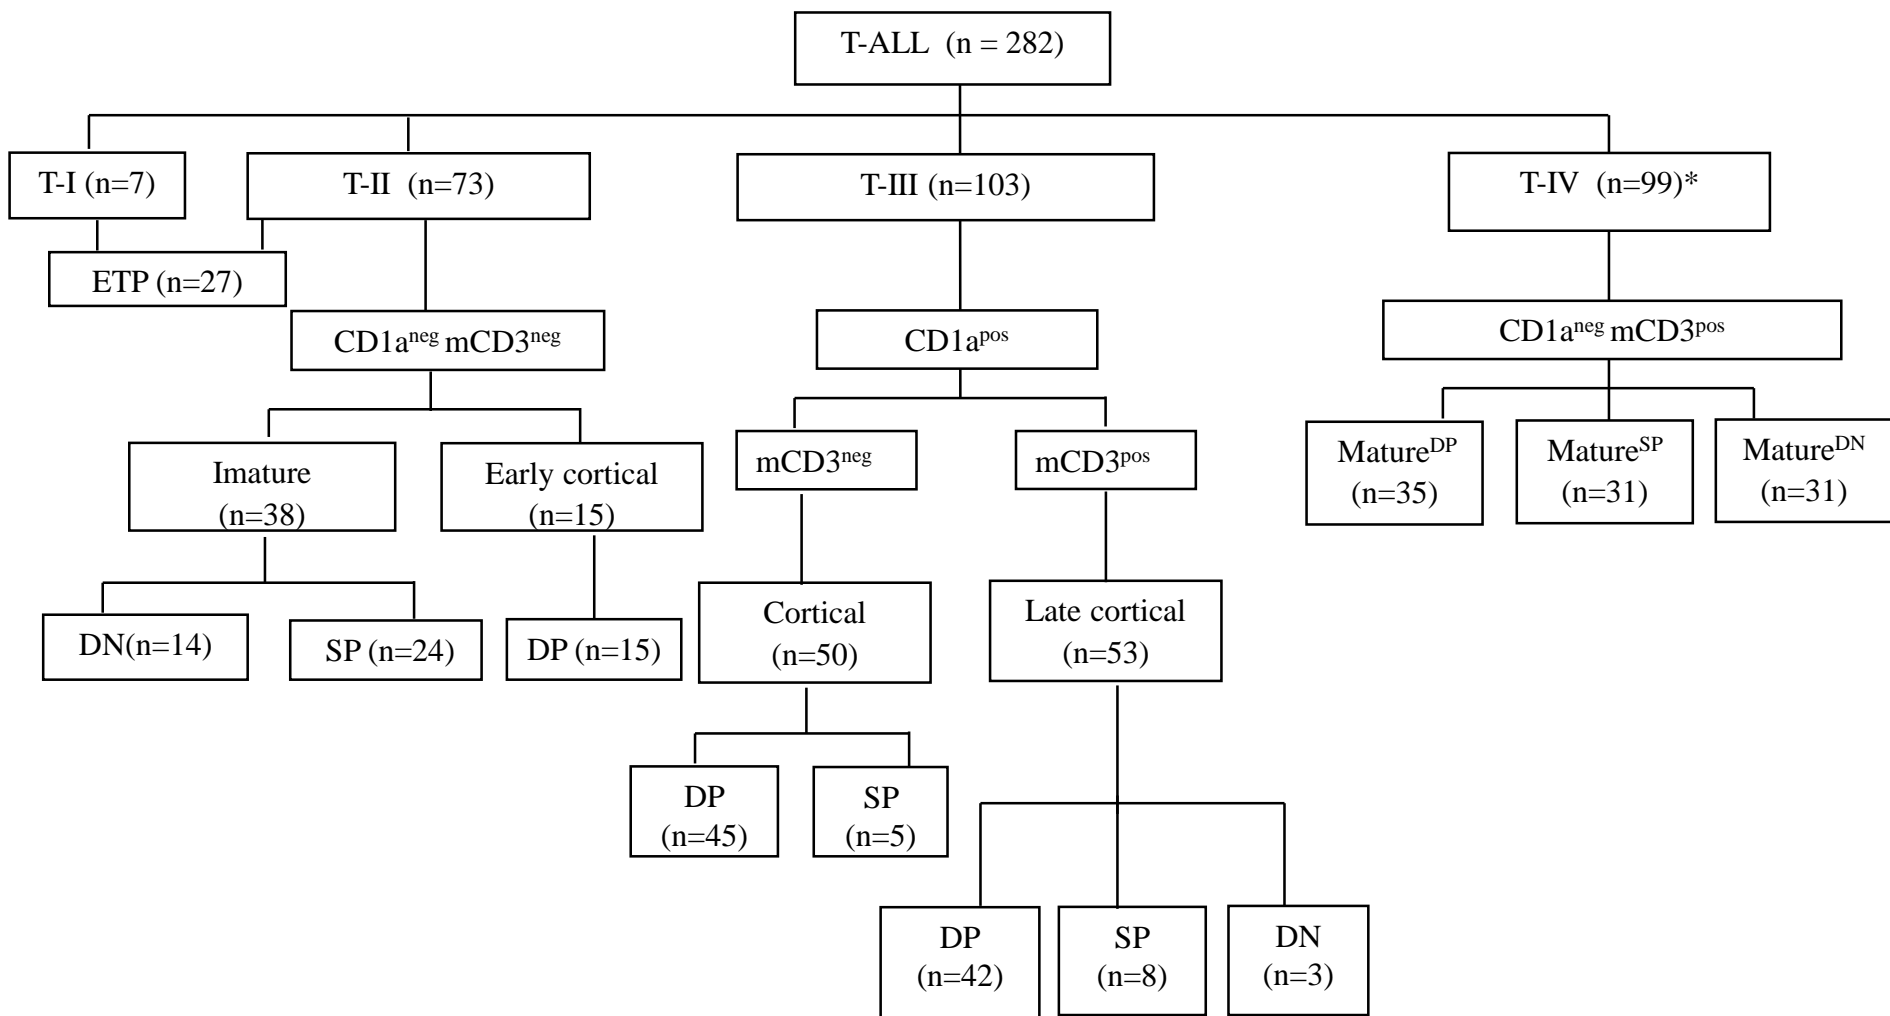

**Supplementary Figure 2: Revisiting the immunophenotypic subtypes of our cohort of pediatric T-cell Acute lymphoblastic Leukemia.**

Abbreviations: T-ALL – T-cell Acute lymphoblastic Leukemia; ETP – early T cell precursor; Neg – negative; Pos – positive; n – number of cases, DN – CD4/CD8 double negative; DP – CD4/CD8 double positive; SP – Single positive for CD4 or CD8; \*Two T-IV cases were not tested to CD4 and/or CD8.
